# Supplementary material for: Margaritaria nobilis L.F. (Phyllanthaceae): Ethnopharmacology and Application of Computational Tools in the Annotation of Bioactive Molecules
Source: MDPI journal article supplement (doi:10.3390/metabo12080681), 2022-07-25
Supplement: s1 [file s1]

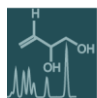

Supplementary Material

for

# ***Margaritaria nobilis* L.f. (Phyllanthaceae): Ethnopharmacology and Application of Computational Tools in the Annotation of Bioactive Molecules**

Johan Carlos C. Santiago <sup>1</sup>, Carlos Alberto B. Albuquerque <sup>1</sup>, Abraão de Jesus B. Muribeca <sup>1</sup>, Paulo Roberto C. Sá <sup>2</sup>, Sônia das Graças Santa R. Pamplona <sup>1</sup>, Consuelo Yumiko Y. e Silva <sup>1,3</sup>, Paula Cardoso Ribera <sup>3</sup>, Enéas de Andrade Fontes-Júnior <sup>3</sup> and Milton Nascimento da Silva <sup>1,\*</sup>

<sup>1</sup> Laboratory of Liquid Chromatography (Labcrol), Institute of Exact and Natural Sciences, Federal University of Pará, 66075-110, Brazil; johan.santiago@itec.ufpa.br (J.C.C.S.); carlos.albuquerque@icen.ufpa.br (C.A.B.A.); abraao\_muribeca@hotmail.com (A.d.J.B.M.); sgpamplona@yahoo.com.br (S.d.G.S.R.P.); yumikoyoshioka@yahoo.com.br (C.Y.Y.e.S.);

<sup>2</sup> Federal Institute of Pará, 68740-970, Brazil; paulo.sa@ifpa.edu.br (P.R.C.S.);

<sup>3</sup> Faculty of Pharmaceutical Sciences, Federal University of Pará, 66075-110, Brazil; paularibera17@gmail.com (P.C.R.); efontes@ufpa.br (E.d.A.F.J.).

\* Correspondence: yumilton@yahoo.com.br (M.S); Tel.: +55-91-3201-7365

**Figure S1.** LC-MS Base Peak Intensity (BPI) chromatogram of the EtOH extract from *Margaritaria nobilis* leaves (negative mode). The selected chromatographic peaks are annotated with peak numbers referred to in Table 1.

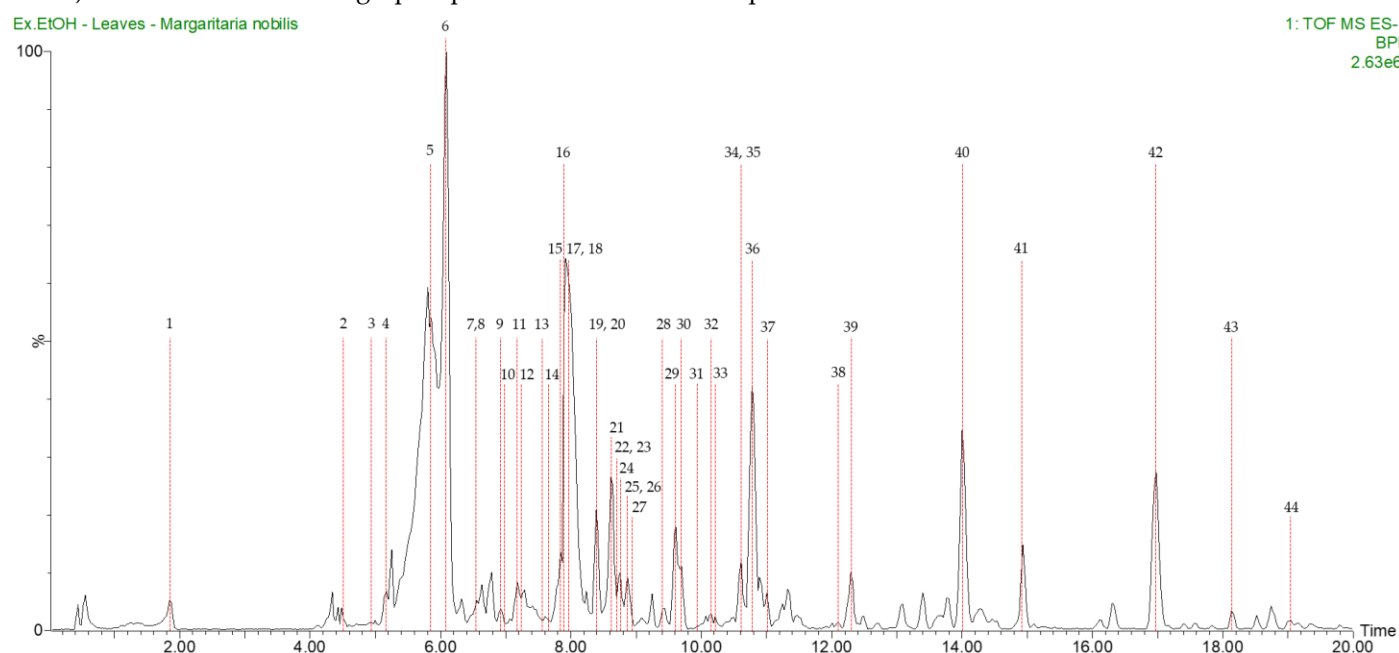

**Table S1.** Summary of compound-dependent parameters used in the UHPLC-ESI-QToF-MS/MS experiment.

| LC parameters           | Value                                               | Ion Source parameters       | ESI(–) mode |
|-------------------------|-----------------------------------------------------|-----------------------------|-------------|
| Column                  | BEH C18 Waters<br>(50 × 2.1 mm, 1.7 μm)             | Acquisition mode            | Resolution  |
| Column temperature      | 40 °C                                               | Capillary voltage           | 2.0 kV      |
| Autosampler temperature | 25 °C                                               | Cone voltage                | 40 V        |
| Mobile phase (A)        | Ultra-pure water acidified<br>with 0.1% formic acid | Source temperature          | 120 °C      |
| Mobile phase (B)        | Acetonitrile acidified with<br>0.1% formic acid     | Desolvation gas temperature | 450 °C      |
| Injection volume        | 2 μL                                                | Desolvation gas flow        | 800 L/h     |
| Flow rate               | 300 μL/min                                          | Cone gas flow               | 50 L/h      |
| Gradient method         | 0 min - 10% B; 2 min - 20% B;<br>30 min - 50% B.    | Lockspray capillary voltage | 2.5 kV      |

| Mass Spectrometry acquisition parameters | Value                    |
|------------------------------------------|--------------------------|
| MS Survey Da Range                       | <i>m/z</i> 100-1200      |
| Intensity threshold                      | 1E2                      |
| Data format                              | Centroid                 |
| Fragmented ion for each scan             | 5                        |
| Scan rate                                | 5 s                      |
| Charge states                            | –1 and –2                |
| Collision Energy Profile                 | 10, 20, 30, 40 and 50 eV |

**Figure S2.** Molecular network from UHPLC-MS/MS data in the negative ion mode for *Margaritaria nobilis* leaf extract.

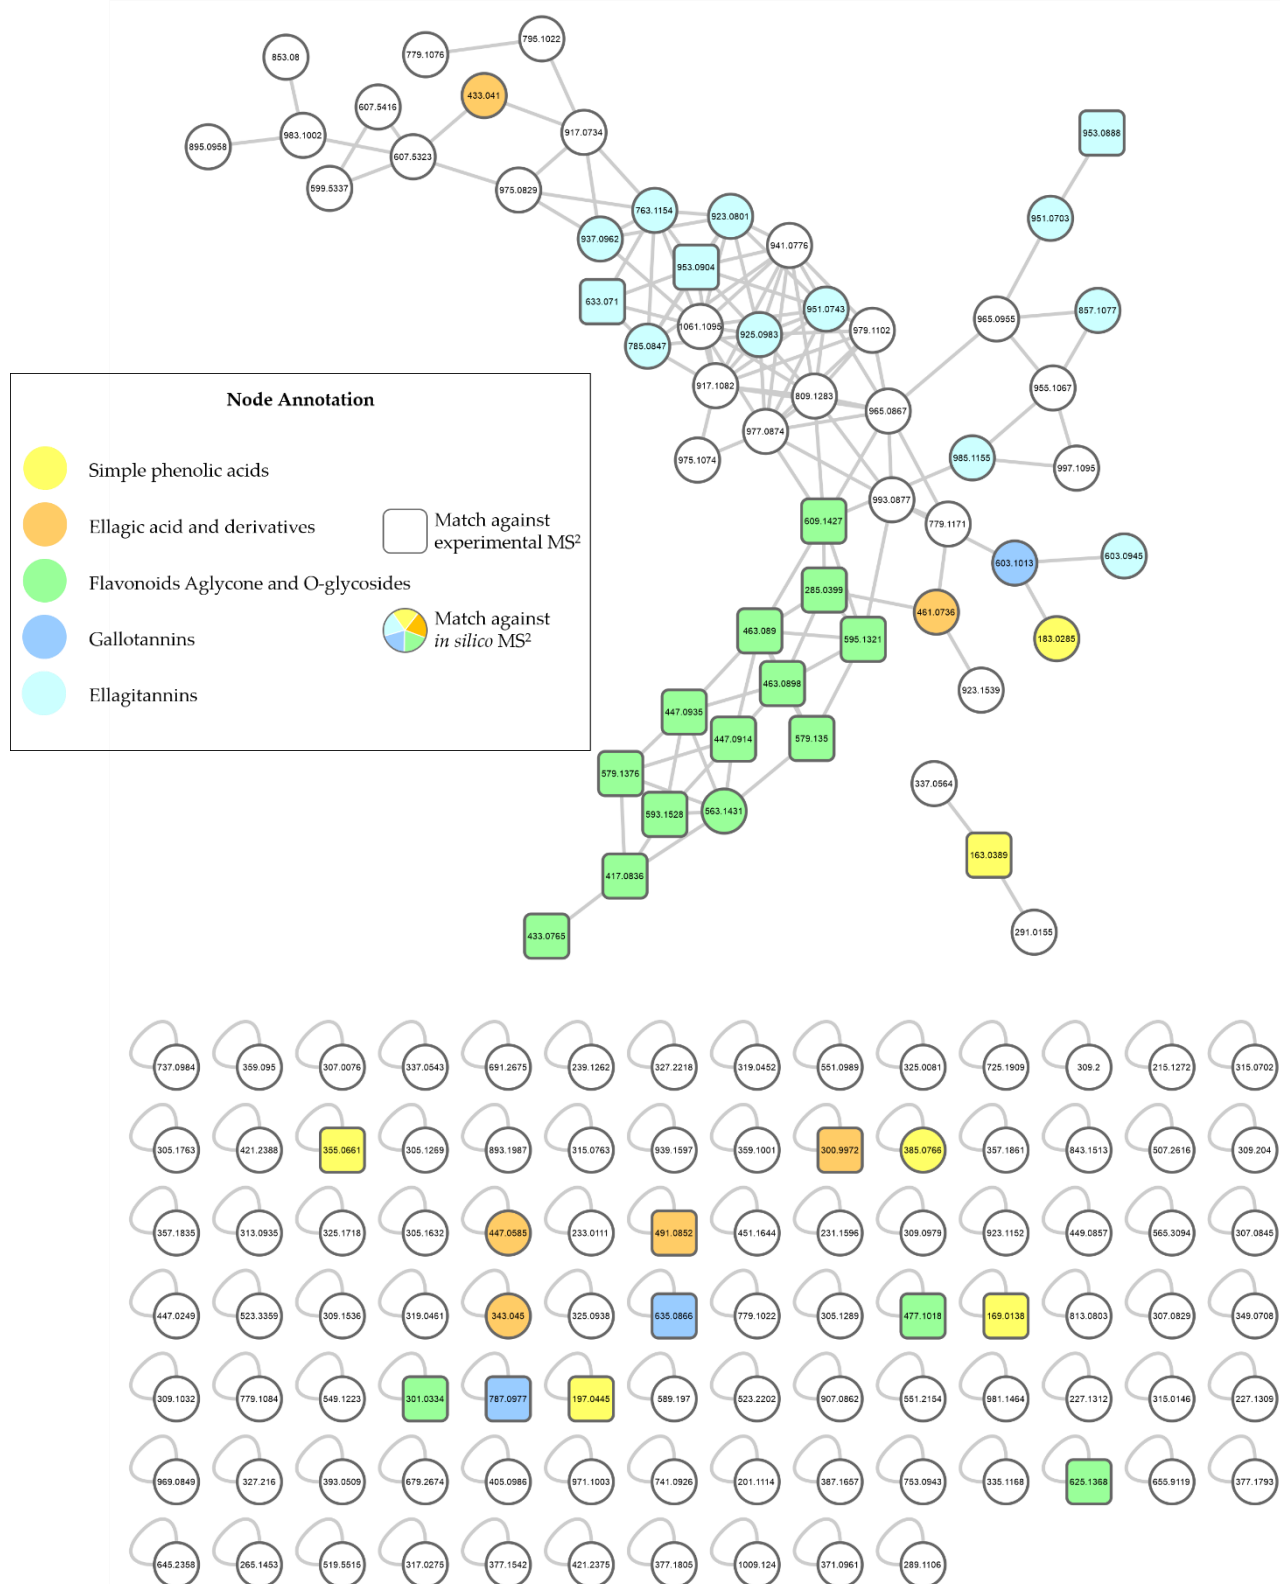

**Note:** Numbers inside the nodes correspond to the  $m/z$  accurate masses (Da) for the  $[M-H]^-$  for each precursor ion. Node colors represent the different groups and subgroups: Phenolic Acids derivatives (yellow: simple phenolic acids; orange: ellagic acid and derivatives), Flavonoids Aglycone and O-glycosides (green) and Hydrolysable Tannins (dark blue: gallotannins; light blue: ellagitannins). Round rectangle shapes correspond to a match against an experimental MS<sup>2</sup>; colored ellipse shapes are identifications from *in silico* spectra matching.

**Figure S3.** Proposed structures for annotated metabolites in the ethanolic extract of *Margaritaria nobilis* leaves.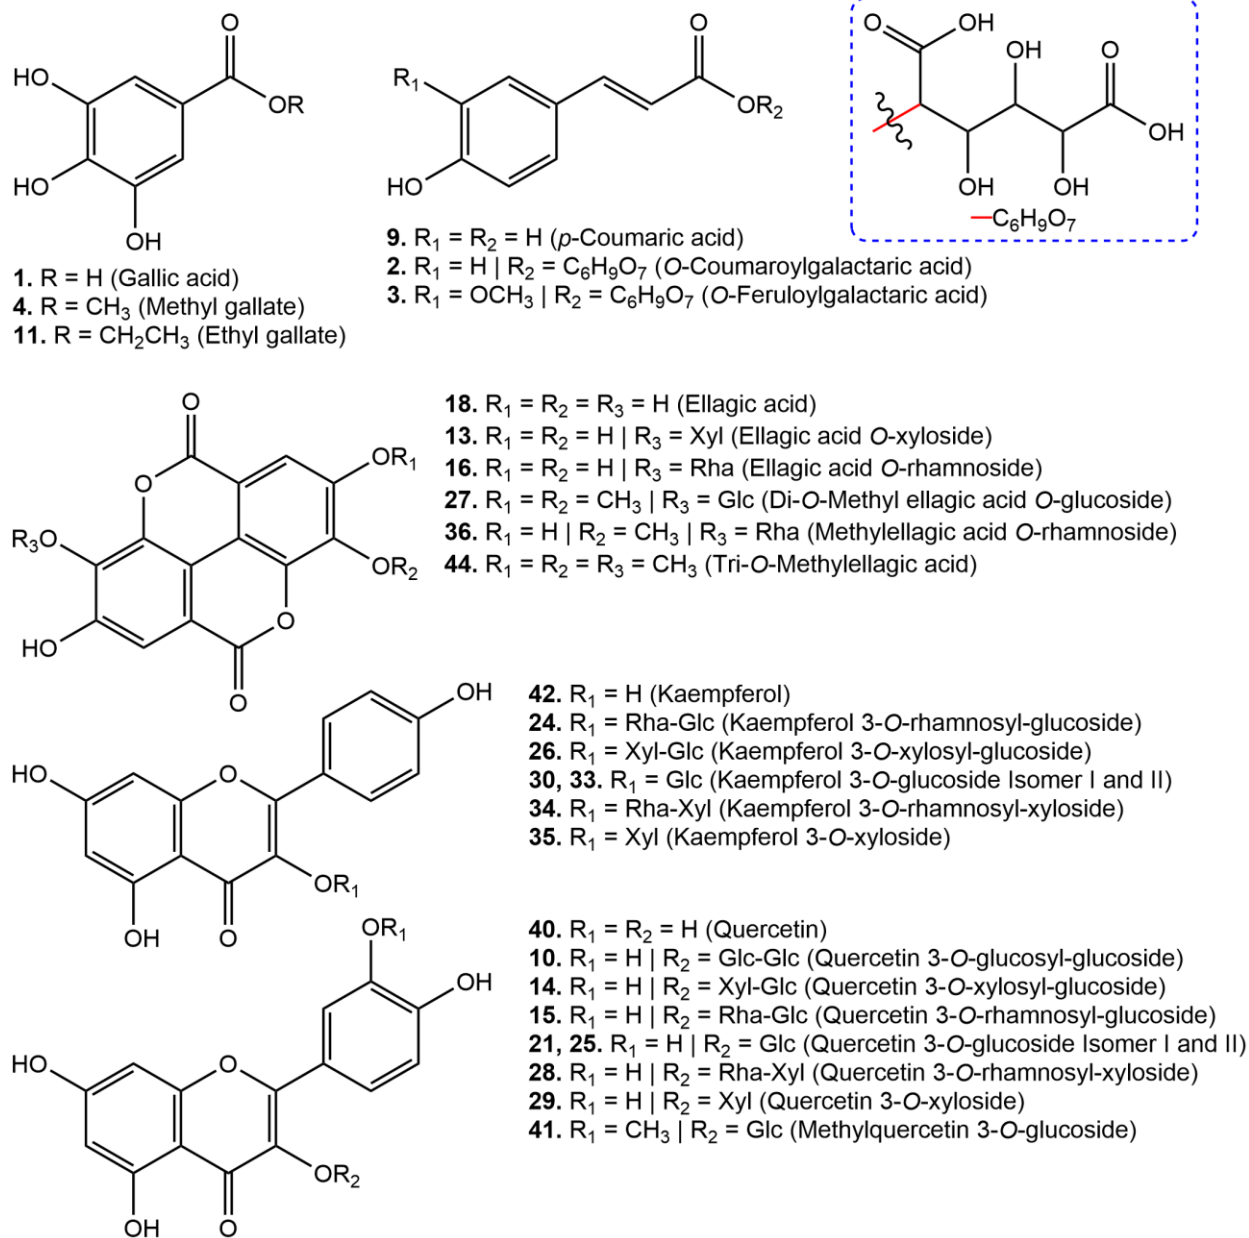

## Glycosylated substituents in the structure of Flavonoids.

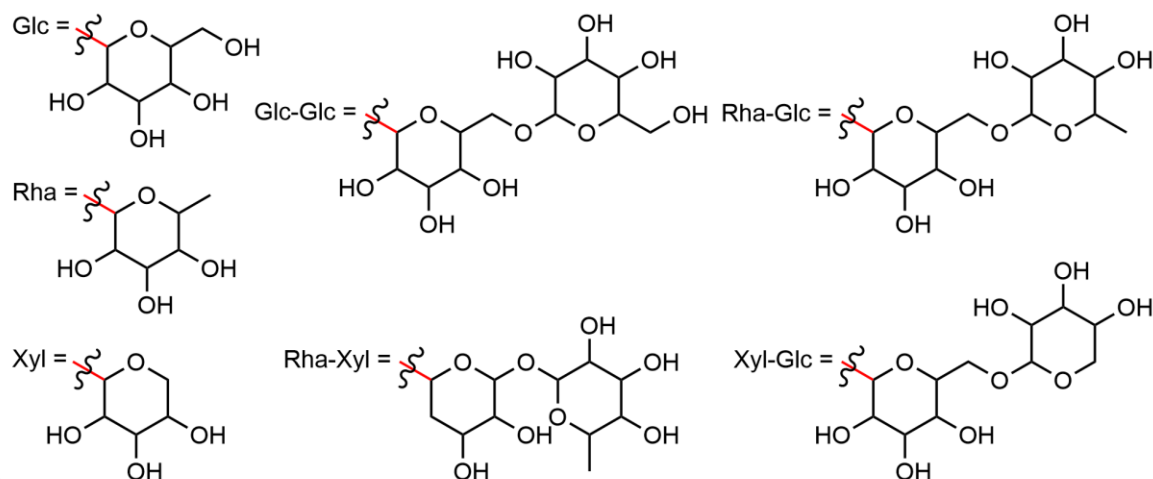

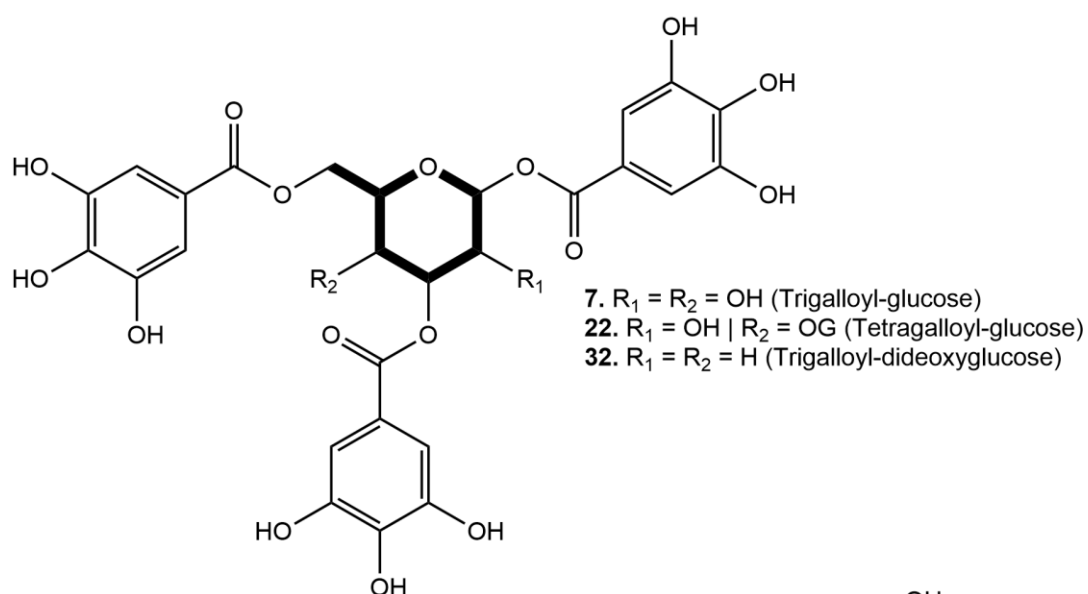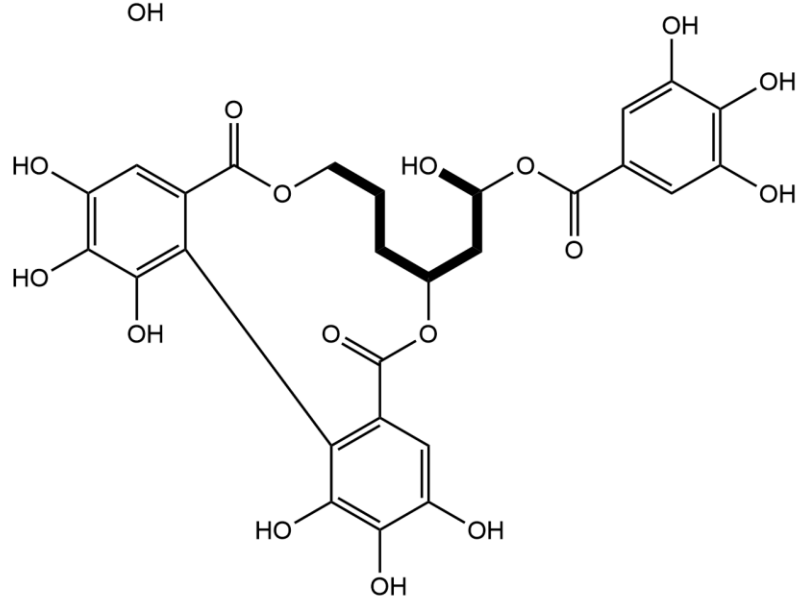

31. Galloyl-HHDP-dideoxyglucose

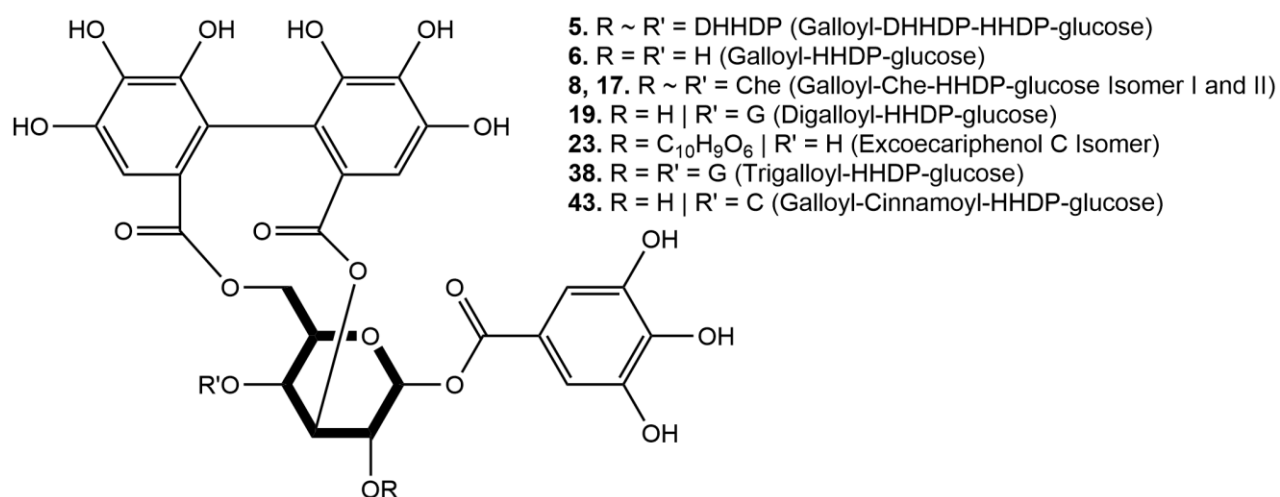

**Note:** C–C bonds of glucose in bold.

12. Phyllanthusiin C Isomer

R~R' =

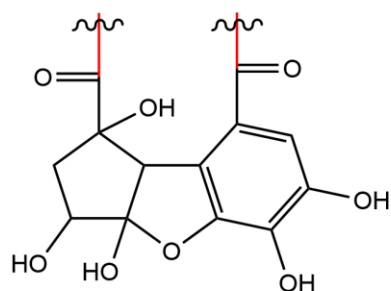

37. Phyllanthusiin A Isomer

R~R' =

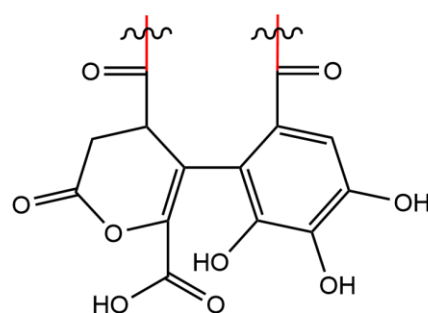

20. Methyl neochebulagate Isomer

R = H | R' =

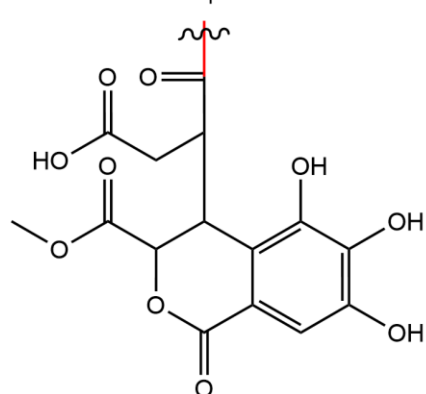

39. Phyllanthusiin U Isomer

R~R' =

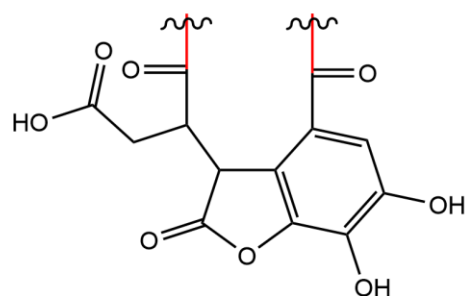

Cinnamoyl, Galloyl and its congener esters in the structure of Hydrolysable Tannins.

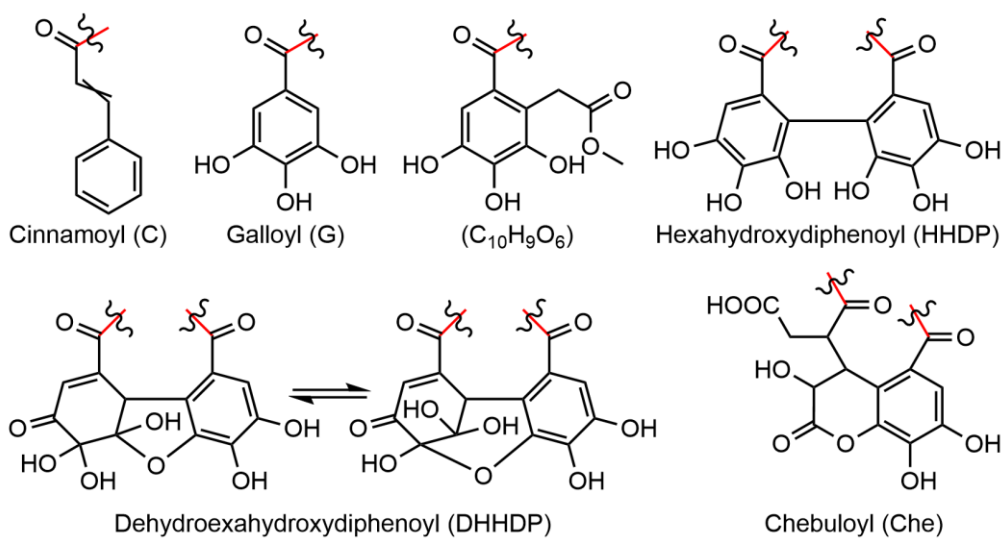

**Note:** Proposed structures for ions of interest using as an initial reference point the structure of compounds of the class already reported in the genus or family of *M. nobilis*, with priority given to elemental compositions that were within +/-5 ppm of the calculated values.

**Figure S4.** General fragmentation scheme and MS/MS spectra of *O*-glycosylated kaempferol derivatives.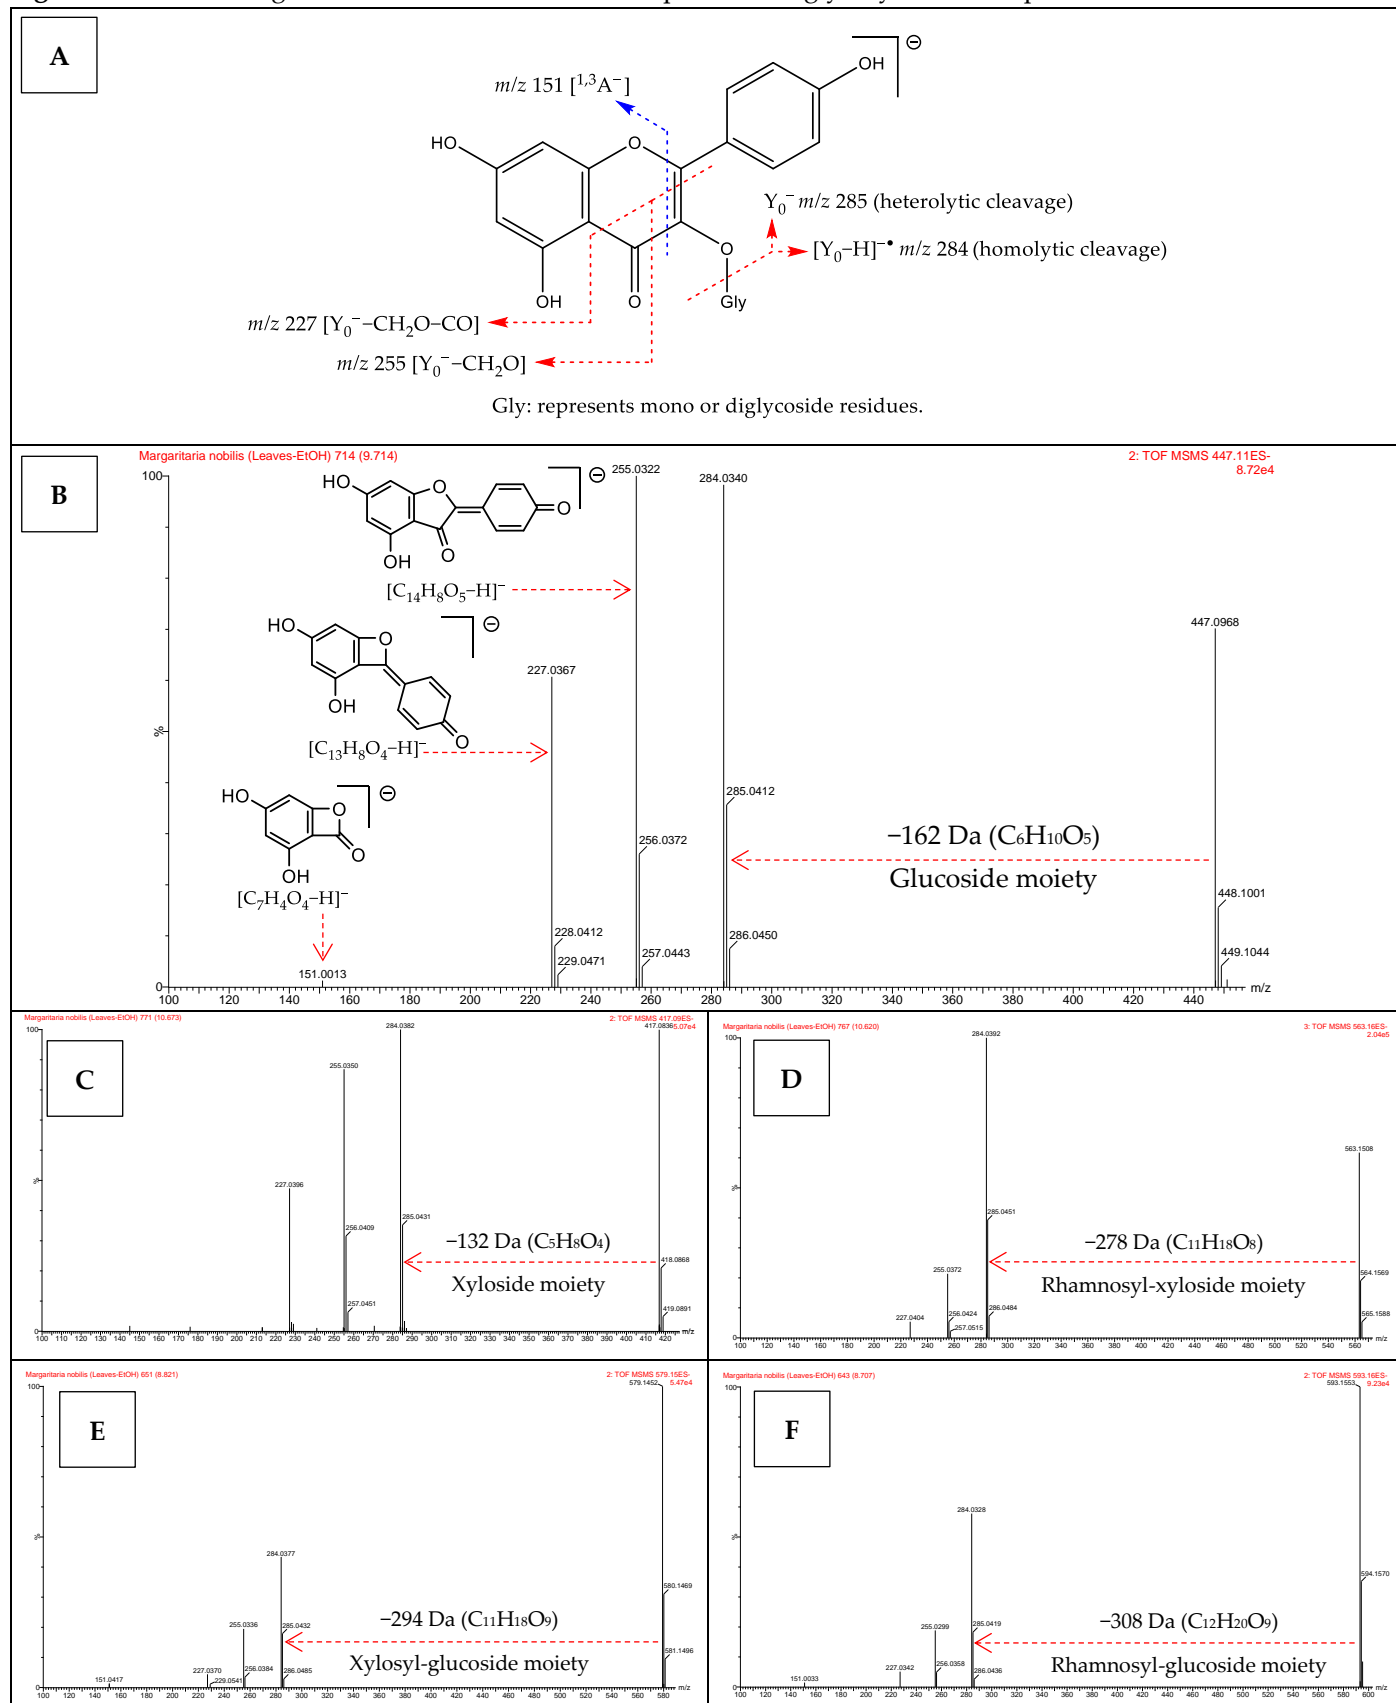

**Note:** (A) General fragmentation scheme of *O*-glycosylated kaempferol derivatives; (B) Kaempferol *O*-glucoside MS/MS spectrum and its main fragments; MS/MS spectra of: (C) Kaempferol *O*-xyloside; (D) Kaempferol *O*-rhamnosyl-xyloside; (E) Kaempferol *O*-xylosyl-glucoside and (F) Kaempferol *O*-rhamnosyl-glucoside.

**Figure S5.** O-glycosylated quercetin derivatives MS/MS spectra.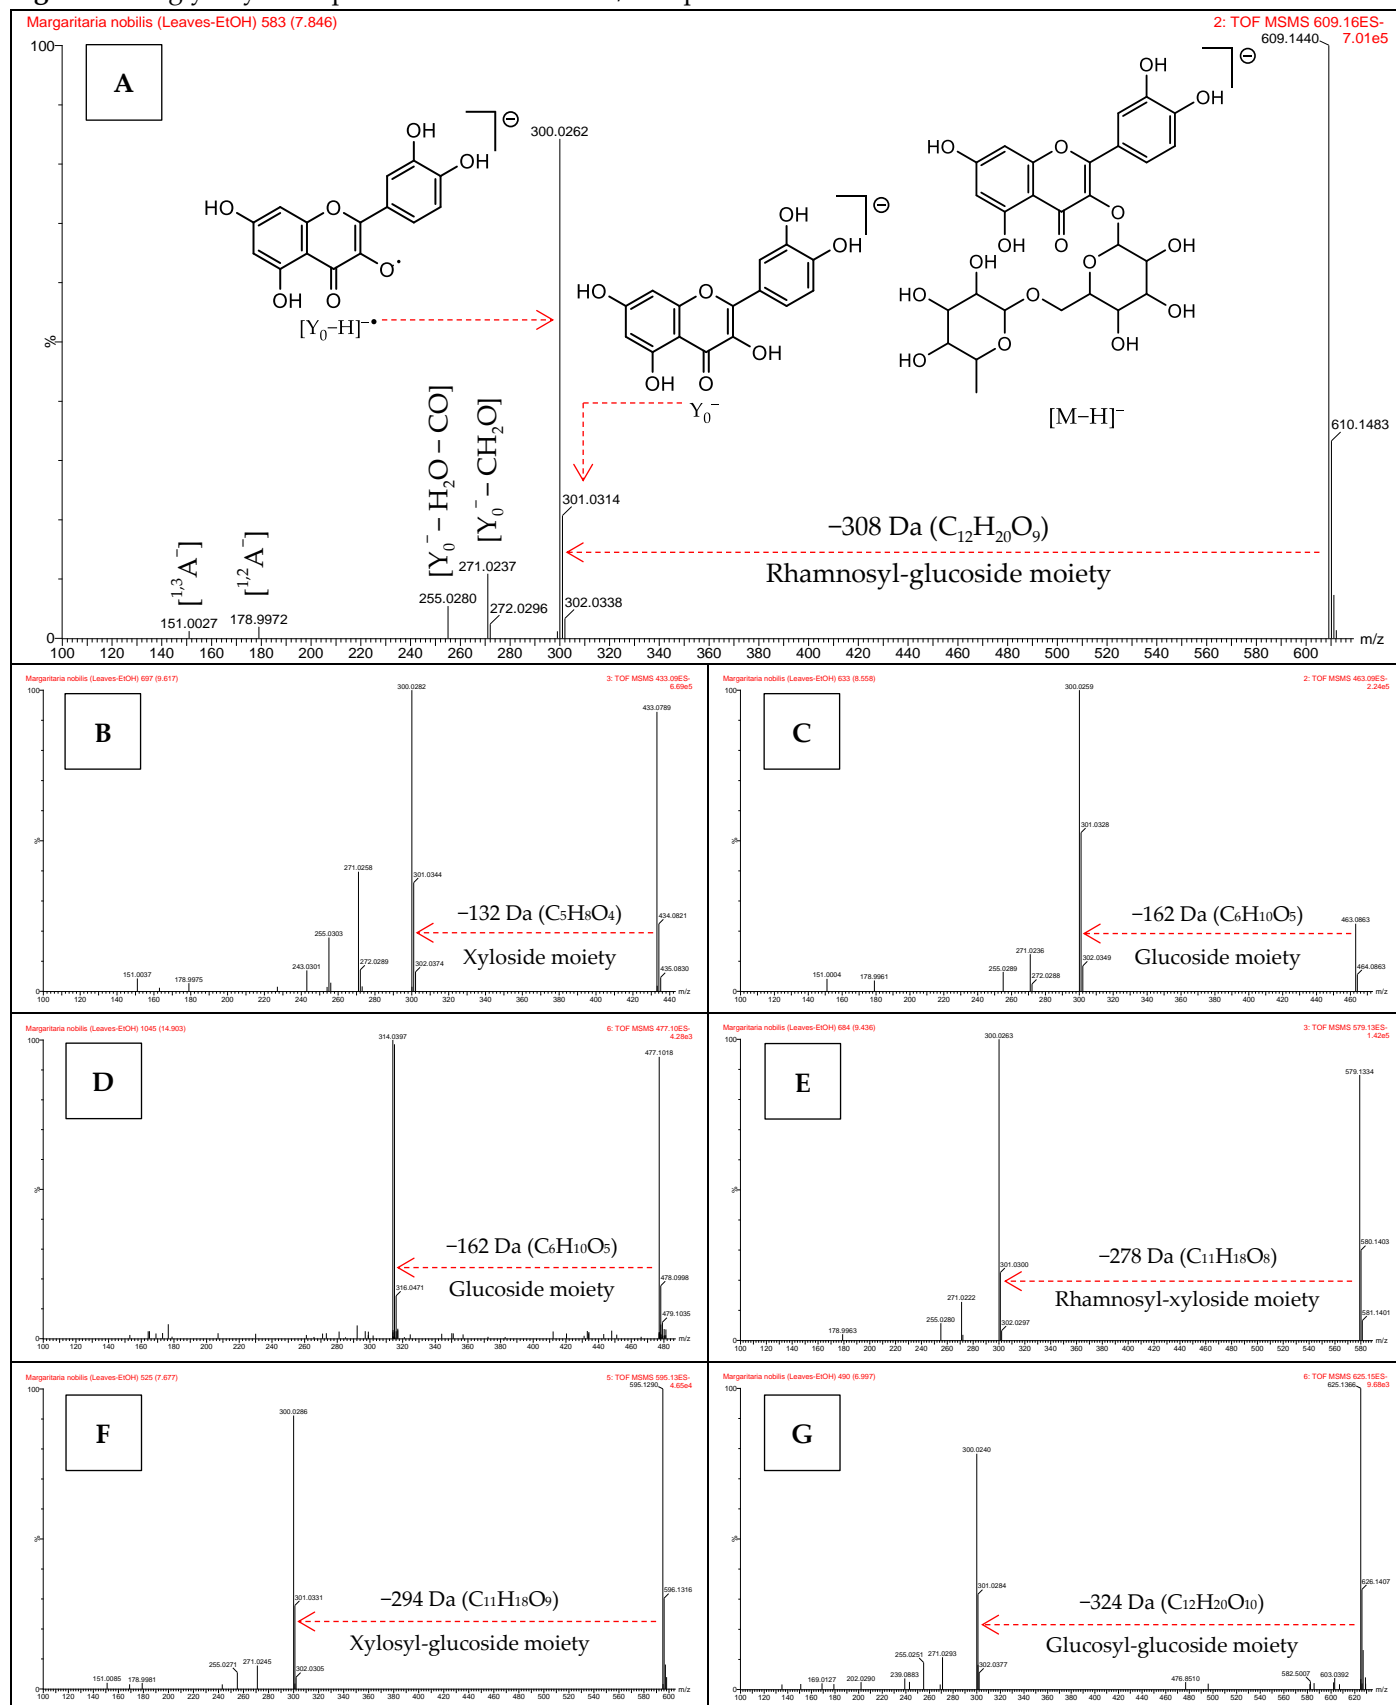

**Note:** (A) Quercetin O-rhamnosyl-glucoside spectra and its main fragments; MS/MS spectra of: (B) quercetin O-xyloside; (C) quercetin O-glucoside; (D) methylquercetin O-glucoside; (E) quercetin O-rhamnosyl-xyloside; (F) Quercetin O-xylosyl-glucoside and (G) quercetin O-glucosyl-glucoside.



**Figure S6.** MS/MS spectra of hydrolysable tannins annotated *in silico*.

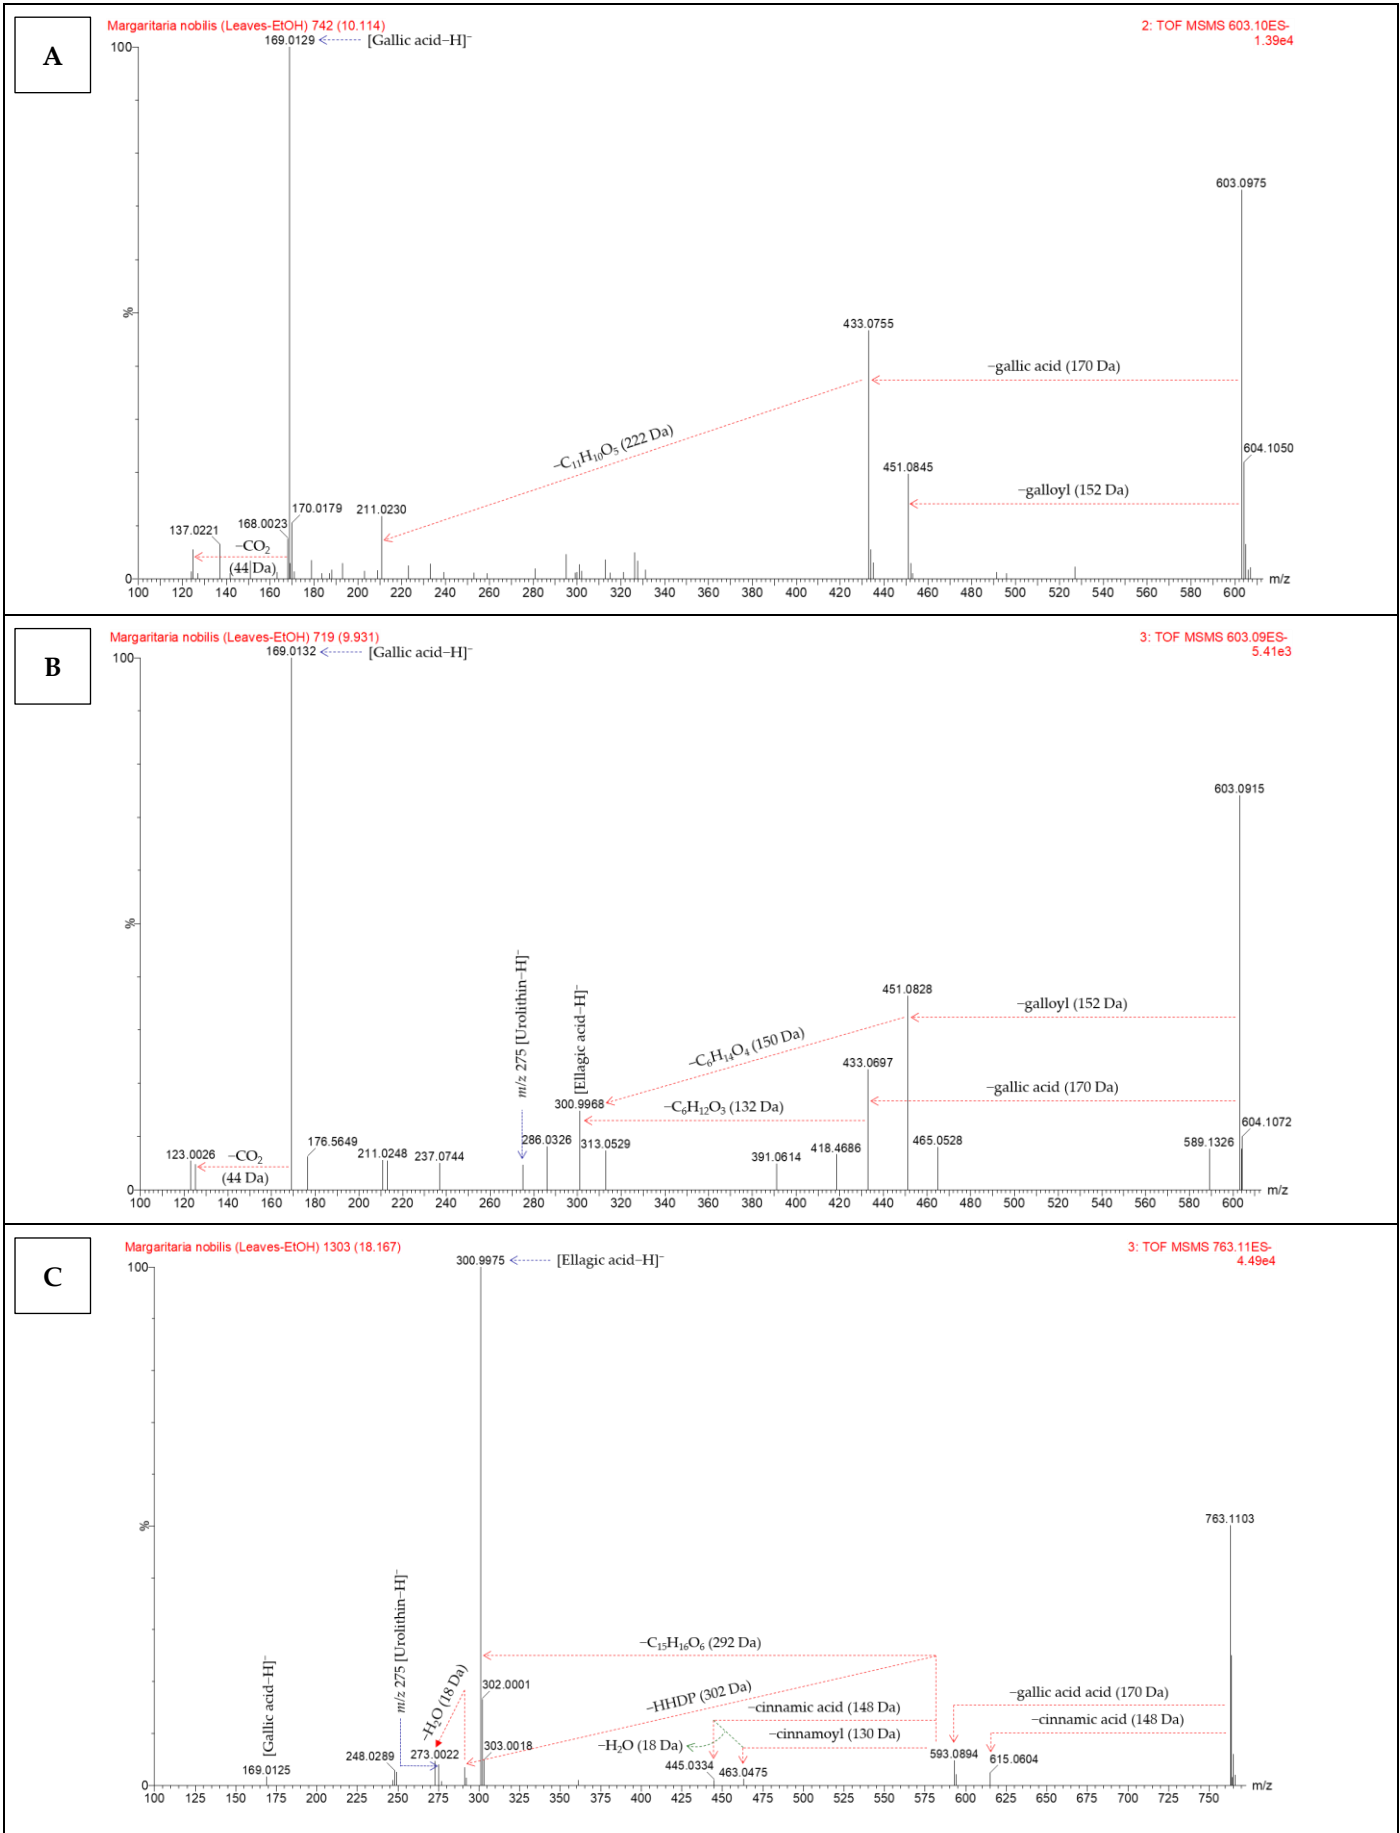

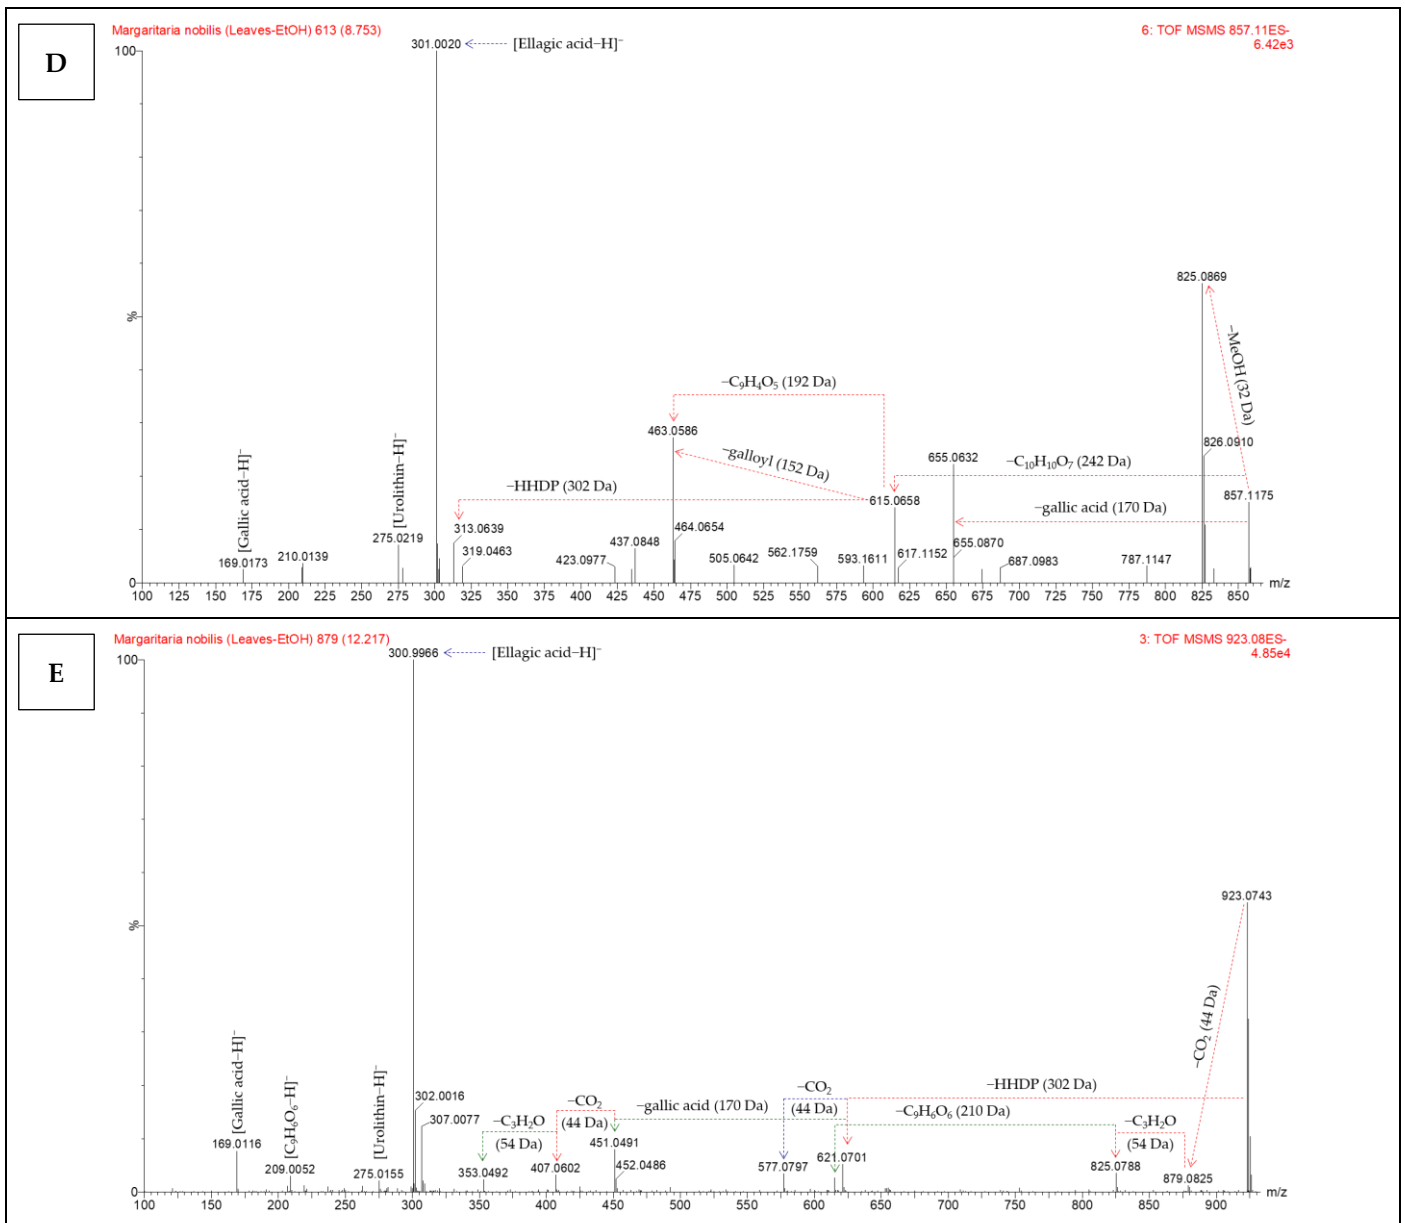

**Note:** (A) Trigalloyl-dideoxyglucose; (B) Galloyl-HHDP-dideoxyglucose; (C) Galloyl-Cinnamoyl-HHDP-glucose; (D) Excoecariphenol C Isomer and (E) Phyllanthusiin U Isomer.

**Table S2.** In-house database of compounds reported in the genus *Margaritaria* (Phyllanthaceae).

| ID | Compound                                             | Molecular Formula                              | [M-H] <sup>-</sup> Calculated | InChI                                                                            | Species | Reference |
|----|------------------------------------------------------|------------------------------------------------|-------------------------------|----------------------------------------------------------------------------------|---------|-----------|
| 1  | 4-Hydroxybenzoic acid                                | C <sub>7</sub> H <sub>6</sub> O <sub>3</sub>   | 137.0239                      | InChI=1S/C7H6O3/c8-6-3-1-5(2-4-6)7(9)10/h1-4,8H,(H,9,10)                         | MD      | [1]       |
| 2  | 3-Hydroxy-4-methoxybenzaldehyde                      | C <sub>8</sub> H <sub>8</sub> O <sub>3</sub>   | 151.0395                      | InChI=1S/C8H8O3/c1-11-8-3-2-6(5-9)4-7(8)10/h2-5,10H,1H3                          | MD      | [1]       |
| 3  | 2-Hydroxyphenylacetic acid                           | C <sub>8</sub> H <sub>8</sub> O <sub>3</sub>   | 151.0395                      | InChI=1S/C8H8O3/c9-7-4-2-1-3-6(7)5-8(10)11/h1-4,9H,5H2,(H,10,11)                 | MD      | [1]       |
| 4  | 4-Hydroxyphenylacetic acid                           | C <sub>8</sub> H <sub>8</sub> O <sub>3</sub>   | 151.0395                      | InChI=1S/C8H8O3/c9-7-3-1-6(2-4)5-8(10)11/h1-4,9H,5H2,(H,10,11)                   | MD      | [1]       |
| 5  | 3,4-Dihydroxybenzoic acid                            | C <sub>7</sub> H <sub>6</sub> O <sub>4</sub>   | 153.0188                      | InChI=1S/C7H6O4/c8-5-2-1-4(7(10)11)3-6(5)9/h1-3,8-9H,(H,10,11)                   | MD      | [1]       |
| 6  | Vanillic acid                                        | C <sub>8</sub> H <sub>8</sub> O <sub>4</sub>   | 167.0344                      | InChI=1S/C8H8O4/c1-12-7-4-5(8(10)11)2-3-6(7)9/h2-4,9H,1H3,(H,10,11)              | MD      | [1]       |
| 7  | Gallic acid                                          | C <sub>7</sub> H <sub>6</sub> O <sub>5</sub>   | 169.0137                      | InChI=1S/C7H6O5/c8-4-1-3(7(11)12)2-5(9)6(4)10/h1-2,8-10H,(H,11,12)               | MD, MN  | [1,2]     |
| 8  | Methyl gallate                                       | C <sub>8</sub> H <sub>8</sub> O <sub>5</sub>   | 183.0293                      | InChI=1S/C8H8O5/c1-13-8(12)4-2-5(9)7(11)6(10)3-4/h2-3,9-11H,1H3                  | MN      | [2]       |
| 9  | 2-Hydroxy-2-(2-hydroxyphenyl)acetic acid ethyl ester | C <sub>10</sub> H <sub>12</sub> O <sub>4</sub> | 195.0657                      | InChI=1S/C10H12O4/c1-2-14-10(13)9(12)7-5-3-4-6-8(7)11/h3-6,9,11-12H,2H2,1H3      | MD      | [1]       |
| 10 | Vanillyl glycol                                      | C <sub>10</sub> H <sub>14</sub> O <sub>4</sub> | 197.0814                      | InChI=1S/C10H14O4/c1-14-10-5-7(2-3-9(10)13)4-8(12)6-11/h2-3,5,8,11-13H,4,6H2,1H3 | MD      | [1]       |
| 11 | Dodecanoic acid                                      | C <sub>12</sub> H <sub>24</sub> O <sub>2</sub> | 199.1698                      | InChI=1S/C12H24O2/c1-2-3-4-5-6-7-8-9-10-11-12(13)14/h2-11H2,1H3,(H,13,14)        | MD      | [1]       |

|    |                                         |                                                 |          |                                                                                                                          |    |     |
|----|-----------------------------------------|-------------------------------------------------|----------|--------------------------------------------------------------------------------------------------------------------------|----|-----|
| 12 | Securinine                              | C <sub>13</sub> H <sub>15</sub> NO <sub>2</sub> | 216.1025 | InChI=1S/C13H15NO2/c15-12-7-9-4-5-10-8-13(9,16-12)11-3-1-2-6-14(10)11/h4-5,7,10-11H,1-3,6,8H2/t10-,11-,13+/m1/s1         | MD | [1] |
| 13 | Allosecurinin                           | C <sub>13</sub> H <sub>15</sub> NO <sub>2</sub> | 216.1025 | InChI=1S/C13H15NO2/c15-12-7-9-4-5-10-8-13(9,16-12)11-3-1-2-6-14(10)11/h4-5,7,10-11H,1-3,6,8H2                            | MI | [3] |
| 14 | (-)-Securinine                          | C <sub>13</sub> H <sub>15</sub> NO <sub>2</sub> | 216.1025 | InChI=1S/C13H15NO2/c15-12-7-9-4-5-10-8-13(9,16-12)11-3-1-2-6-14(10)11/h4-5,7,10-11H,1-3,6,8H2/t10-,11-,13+/m1/s1         | MI | [3] |
| 15 | (+)-Philantidine                        | C <sub>13</sub> H <sub>15</sub> NO <sub>3</sub> | 232.0974 | InChI=1S/C13H15NO3/c15-12-7-9-4-5-10-8-13(9,16-12)11-3-1-2-6-14(11)17-10/h4-5,7,10-11H,1-3,6,8H2                         | MN | [2] |
| 16 | (+)-15-Methoxy-14,15-dihydrophyllocrisy | C <sub>14</sub> H <sub>19</sub> NO <sub>3</sub> | 248.1287 | InChI=1S/C14H19NO3/c1-17-11-6-9-7-13(16)18-14(9)8-10(11)15-5-3-2-4-12(14)15/h7,10-12H,2-6,8H2,1H3/t10?,11?,12?,14-/m0/s1 | MI | [3] |
| 17 | Kaempferol                              | C <sub>15</sub> H <sub>10</sub> O <sub>6</sub>  | 285.0399 | InChI=1S/C15H10O6/c16-8-3-1-7(2-4-8)15-14(20)13(19)12-10(18)5-9(17)6-11(12)21-15/h1-6,16-18,20H                          | MN | [2] |
| 18 | Epicatechin                             | C <sub>15</sub> H <sub>14</sub> O <sub>6</sub>  | 289.0712 | InChI=1S/C15H14O6/c16-8-4-11(18)9-6-13(20)15(21-14(9)5-8)7-1-2-10(17)12(19)3-7/h1-5,13,15-20H,6H2/t13-,15-/m1/s1         | MD | [1] |
| 19 | Catechin                                | C <sub>15</sub> H <sub>14</sub> O <sub>6</sub>  | 289.0712 | InChI=1S/C15H14O6/c16-8-4-11(18)9-6-13(20)15(21-14(9)5-8)7-1-2-10(17)12(19)3-7/h1-5,13,15-20H,6H2/t13-,15+/m0/s1         | MD | [1] |
| 20 | Epigallocatechin                        | C <sub>15</sub> H <sub>14</sub> O <sub>7</sub>  | 305.0661 | InChI=1S/C15H14O7/c16-7-3-9(17)8-5-12(20)15(22-13(8)4-7)6-1-                                                             | MD | [1] |

|    |                                                                  |                                                 |          |                                                                                                                                                                                                                                                |    |     |
|----|------------------------------------------------------------------|-------------------------------------------------|----------|------------------------------------------------------------------------------------------------------------------------------------------------------------------------------------------------------------------------------------------------|----|-----|
|    |                                                                  |                                                 |          | 10(18)14(21)11(19)2-6/h1-4,12,15-21H,5H2/t12-,15-/m1/s1                                                                                                                                                                                        |    |     |
| 21 | Gallocatechin                                                    | C <sub>15</sub> H <sub>14</sub> O <sub>7</sub>  | 305.0661 | InChI=1S/C15H14O7/c16-7-3-9(17)8-5-12(20)15(22-13(8)4-7)6-1-10(18)14(21)11(19)2-6/h1-4,12,15-21H,5H2/t12-,15+/m0/s1                                                                                                                            | MD | [1] |
| 22 | 3-Methoxy-4-hydroxybenzeneacetic acid                            | C <sub>18</sub> H <sub>18</sub> O <sub>8</sub>  | 361.0923 | InChI=1S/C18H18O8/c1-25-13-5-9(7-15(19)20)3-11(17(13)23)12-4-10(8-16(21)22)6-14(26-2)18(12)24/h3-6,23-24H,7-8H2,1-2H3,(H,19,20)(H,21,22)                                                                                                       | MD | [1] |
| 23 | Betulinic acid                                                   | C <sub>30</sub> H <sub>48</sub> O <sub>3</sub>  | 455.3525 | InChI=1S/C30H48O3/c1-18(2)19-10-15-30(25(32)33)17-16-28(6)20(24(19)30)8-9-22-27(5)13-12-23(31)26(3,4)21(27)11-14-29(22,28)7/h19-24,31H,1,8-17H2,2-7H3,(H,32,33)/t19-,20+,21-,22+,23-,24+,27-,28+,29+,30-/m0/s1                                 | MN | [2] |
| 24 | Phagovatin                                                       | C <sub>28</sub> H <sub>32</sub> O <sub>14</sub> | 591.1714 | InChI=1S/C28H32O14/c1-10-20(31)23(34)26(37)28(40-10)39-9-17-21(32)24(35)25(36)27(42-17)19-15(38-2)8-16-18(22(19)33)13(30)7-14(41-16)11-3-5-12(29)6-4-11/h3-8,10,17,20-21,23-29,31-37H,9H2,1-2H3/t10?,17?,20-,21+,23-,24-,25?,26?,27-,28+/m0/s1 | MD | [4] |
| 25 | Hydroxygenkwanin-8-C-[α-rhamnopyranosyl-(1→6)] β-glucopyranoside | C <sub>28</sub> H <sub>32</sub> O <sub>15</sub> | 607.1663 | N/A                                                                                                                                                                                                                                            | MD | [4] |
| 26 | Corilagin                                                        | C <sub>27</sub> H <sub>22</sub> O <sub>18</sub> | 633.0728 | InChI=1S/C27H22O18/c28-9-1-6(2-10(29)16(9)32)24(39)45-27-22(38)23-                                                                                                                                                                             | MN | [2] |

|    |                                                                                                                                                                                      |                                                 |          |                                                                                                                                                                                                                                                                                                                                                                                                            |    |     |
|----|--------------------------------------------------------------------------------------------------------------------------------------------------------------------------------------|-------------------------------------------------|----------|------------------------------------------------------------------------------------------------------------------------------------------------------------------------------------------------------------------------------------------------------------------------------------------------------------------------------------------------------------------------------------------------------------|----|-----|
|    |                                                                                                                                                                                      |                                                 |          | 19(35)13(43-27)5-42-25(40)7-3-<br>11(30)17(33)20(36)14(7)15-8(26(41)44-<br>23)4-12(31)18(34)21(15)37/h1-4,13,19,22-<br>23,27-38H,5H2/t13-,19-,22-,23+,27+/m1/s1                                                                                                                                                                                                                                            |    |     |
| 27 | Kaempferol-3-O- $\alpha$ -rhamnopyranosyl-<br>(1 $\rightarrow$ 2)- $\beta$ -glucopyranoside-7-O- $\alpha$ -<br>rhamnopyranoside                                                      | C <sub>33</sub> H <sub>40</sub> O <sub>19</sub> | 739.2086 | InChI=1S/C33H40O19/c1-10-<br>19(37)23(41)26(44)31(46-10)48-14-7-<br>15(36)18-16(8-14)49-28(12-3-5-13(35)6-4-<br>12)29(22(18)40)51-33-30(25(43)21(39)17(9-<br>34)50-33)52-32-27(45)24(42)20(38)11(2)47-<br>32/h3-8,10-11,17,19-21,23-27,30-39,41-<br>45H,9H2,1-2H3/t10-,11-,17+,19-,20-<br>,21+,23+,24+,25-,26+,27+,30+,31-,32-,33-<br>/m0/s1                                                               | MD | [4] |
| 28 | Kaempferol-3-O- $\alpha$ -rhamnopyranosyl-<br>(1 $\rightarrow$ 2)-[ $\alpha$ -rhamnopyranosyl-(1 $\rightarrow$ 6)]- $\beta$ -<br>glucopyranoside-7-O- $\alpha$ -<br>rhamnopyranoside | C <sub>39</sub> H <sub>50</sub> O <sub>23</sub> | 885.2665 | InChI=1S/C39H50O23/c1-11-<br>21(42)25(46)29(50)37(55-11)58-16-8-<br>17(41)20-18(9-16)59-34(14-4-6-15(40)7-5-<br>14)35(24(20)45)62-39-<br>31(52)27(48)23(44)19(60-39)10-54-36-<br>32(53)28(49)33(13(3)57-36)61-38-<br>30(51)26(47)22(43)12(2)56-38/h4-9,11-<br>13,19,21-23,25-33,36-44,46-53H,10H2,1-<br>3H3/t11?,12?,13?,19?,21-,22-,23-,25-,26-<br>,27?,28+,29?,30?,31?,32?,33-,36+,37-,38-,39-<br>/m0/s1 | MD | [4] |

**Note:** (The data were reported in the literature 1990-2015 - Source: Scopus, Web of Science, Science Direct, Scielo, PubMed and Google Scholar). N/A: Not Available; MN: *Margaritaria nobilis*; MD: *Margaritaria discoidea*; MI: *Margaritaria indica*.

## References

1. Johnson-Ajinwo, O.R.; Richardson, A.; Li, W.-W. Cytotoxic Effects of Stem Bark Extracts and Pure Compounds from *Margaritaria discoidea* on Human Ovarian Cancer Cell Lines. *Phytomedicine* **2015**, *22*, 1–4, doi:10.1016/j.phymed.2014.09.008.
2. Moraes, L.S.; Donza, M.R.H.; Rodrigues, A.P.D.; Silva, B.J.M.; Brasil, D.S.B.; Zoghbi, M.D.G.B.; Andrade, E.H.A.; Guilhon, G.M.S.P.; Silva, E.O.; Schmidt, T.J. Leishmanicidal Activity of (+)-Phyllanthidine and the Phytochemical Profile of *Margaritaria nobilis* (Phyllanthaceae). *Molecules* **2015**, *20*, 22157–22169, doi:10.3390/molecules201219829.
3. Arbain, D.; Byrne, L.; Cannon, J.; Engelhardt, L.; White, A. The Alkaloids of *Margaritaria indica* (Euphorbiaceae). The Crystal Structure and Absolute Configuration of the Hydrobromide of (+)-15 $\alpha$ -Methoxy-14,15-Dihydrophyllorchrysine. *Australian Journal of Chemistry* **1990**, *43*, 439, doi:10.1071/CH9900439.
4. Ekuadzi, E.; Dickson, R.; Fleischer, T.; Annan, K.; Pistorius, D.; Oberer, L.; Gibbons, S. Flavonoid Glycosides from the Stem Bark of *Margaritaria discoidea* Demonstrate Antibacterial and Free Radical Scavenging Activities. *Phytotherapy Research* **2014**, *28*, 784–787, doi:10.1002/ptr.5053.
